# Supplementary material
Source: Royal Society of Chemistry journal article supplement (doi:10.1039/d5nr04964d)
Supplement: d5nr04964d1.pdf [file d5nr04964d1.pdf]

**Amine- and hydroxyl-functionalization of iron nanoparticles for tailoring the properties of Fmoc-FF-based magnetic hydrogels: interfacial design toward biocompatible materials**

Mariusz Barczak<sup>1\*</sup>, Cristina Gila-Vilchez<sup>2,3</sup>, Maria Powężka<sup>1</sup>, Anna Michalicha<sup>4</sup>, Fernando González-Caballero<sup>2</sup>, Miguel Alaminos<sup>5,6</sup>, Olimpia Ortiz-Arrabal<sup>5,6</sup>, Luis Álvarez de Cienfuegos<sup>6,7</sup>, Modesto T. López-López<sup>2,6,8\*</sup>

<sup>1</sup> Institute of Chemical Sciences, Faculty of Chemistry, Maria Curie-Skłodowska University, 20031 Lublin, POLAND

<sup>2</sup> Universidad de Granada, Departamento de Física Aplicada, C.U. Fuentenueva, Granada E-18071, SPAIN

<sup>3</sup> Université d'Orléans, CNRS, CEMHTI UPR 3079, Orléans, FRANCE.

<sup>4</sup> Chair and Department of Biochemistry and Biotechnology, Medical University of Lublin, Chodźki 1, 20093 Lublin, POLAND

<sup>5</sup> Tissue Engineering Group, Department of Histology, University of Granada, Granada, SPAIN

<sup>6</sup> Instituto de Investigación Biosanitaria ibs.GRANADA, Avda. de Madrid 15, Granada E-18012, SPAIN

<sup>7</sup> Universidad de Granada, Departamento de Química Orgánica and Unidad de Excelencia Química Aplicada a Biomedicina y Medioambiente, C.U. Fuentenueva, Granada E-18071, SPAIN

<sup>8</sup> Universidad de Granada, Research Unit "Modeling Nature" (MNat), C.U. Fuentenueva, Granada E-18071, SPAIN

*Corresponding authors: M.B: [mariusz.barczak@mail.umcs.pl](mailto:mariusz.barczak@mail.umcs.pl), M.T. L.-L.: [modesto@ugr.es](mailto:modesto@ugr.es)*

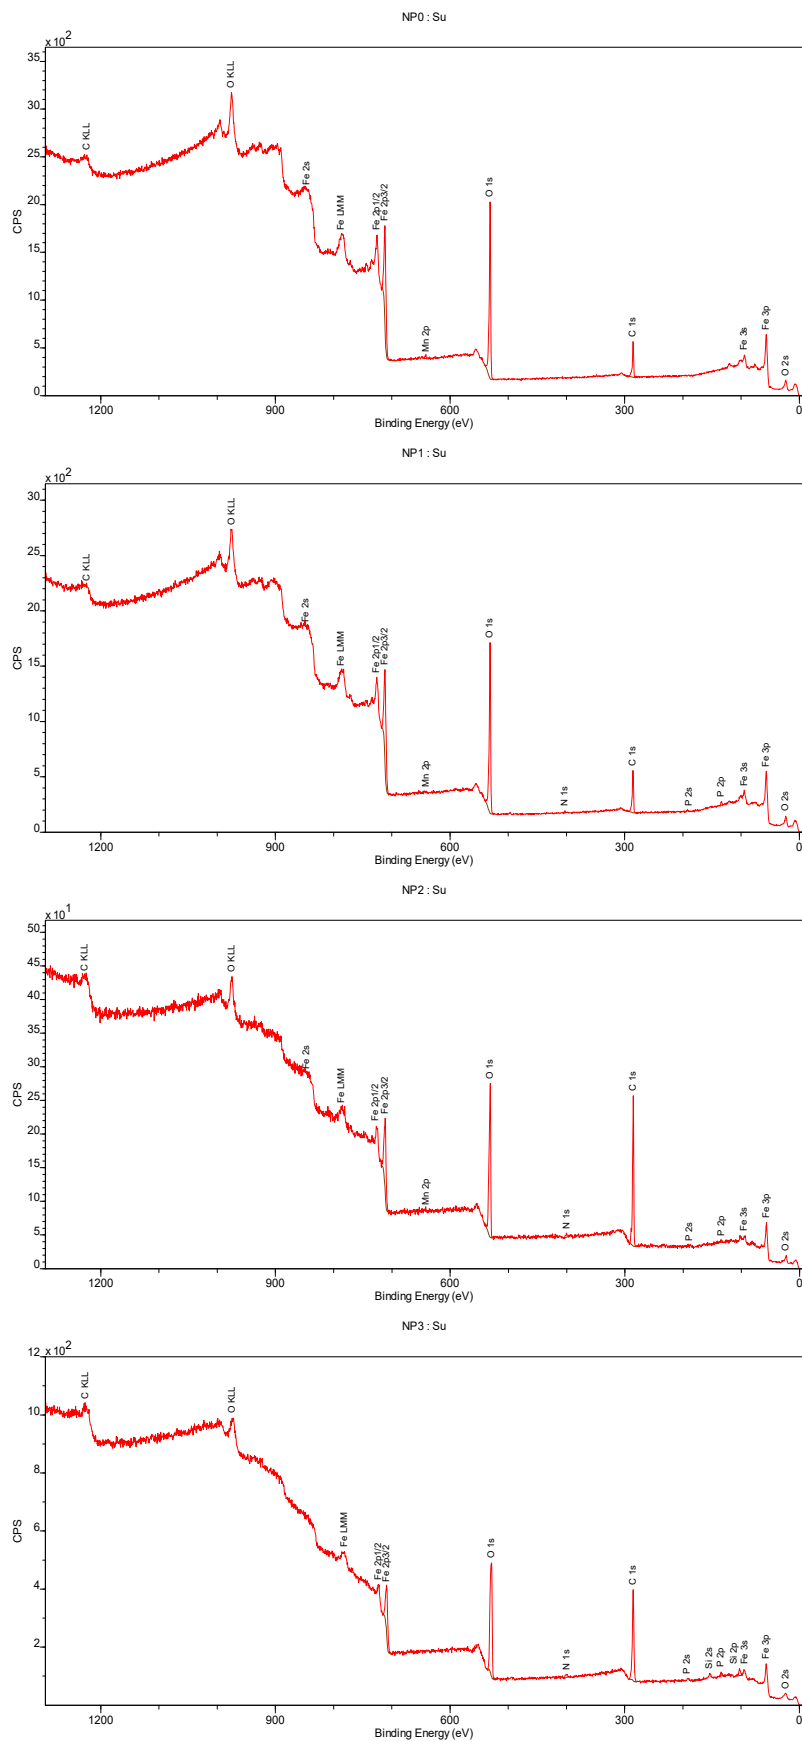

**Fig. S1.** XPS survey spectra for NP0, NP1, NP2 and NP3, respectively

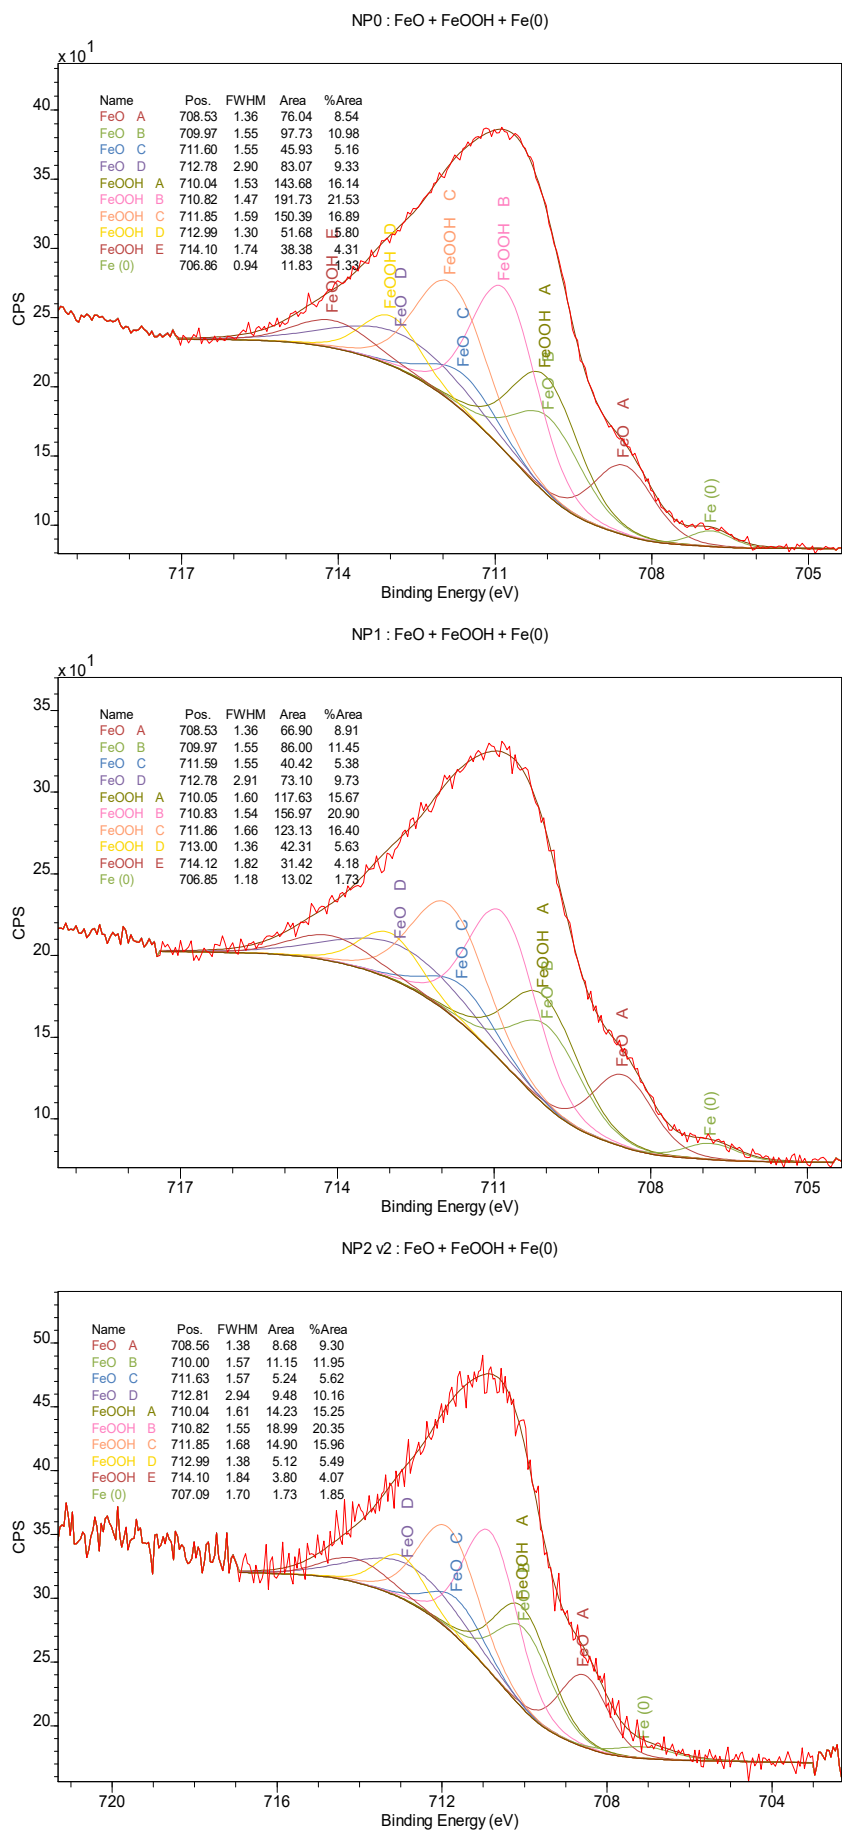

**Fig. S2.** Deconvolution of Fe 2p core energy level for NP0, NP1, and NP2, respectively

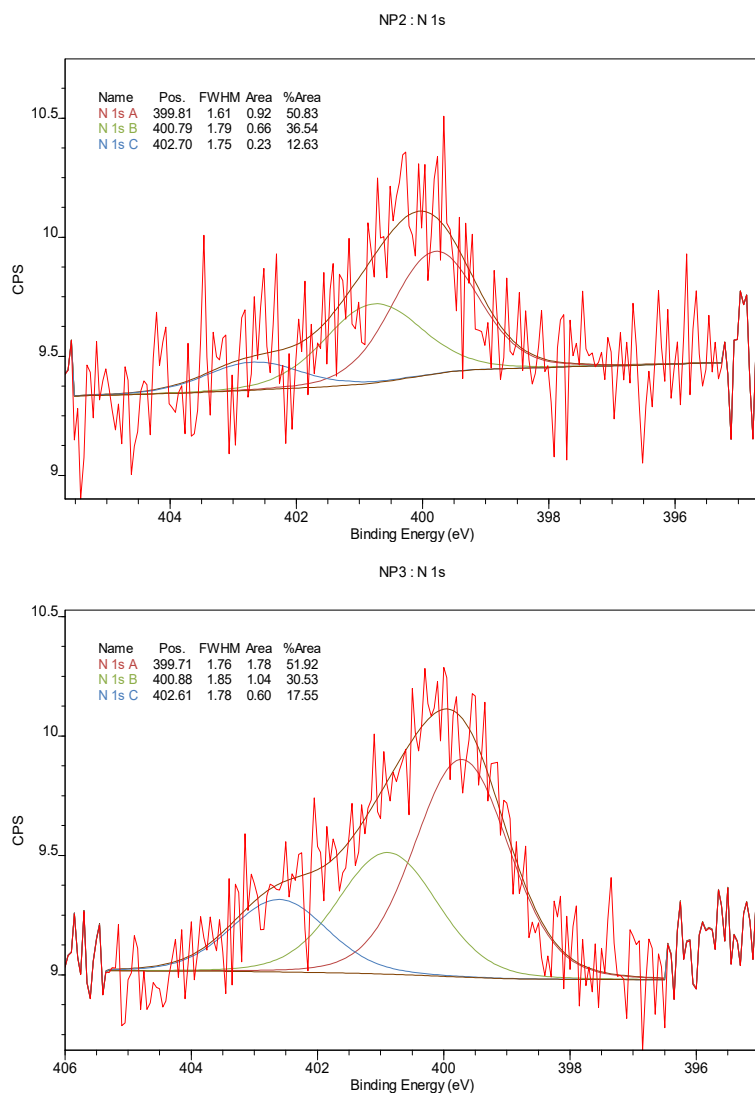

**Fig. S3.** Deconvolution of N 1s core energy level for NP2 and NP3, respectively

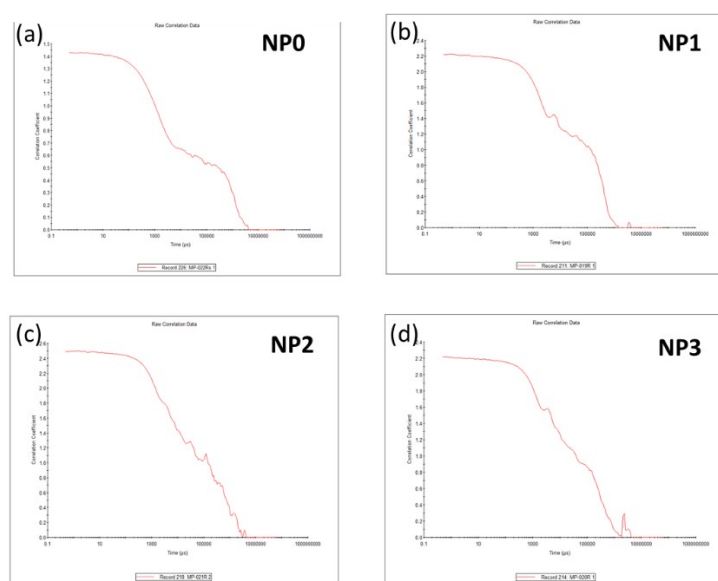

**Fig. S4.** Correlation functions obtained from DLS measurements for the samples NP0, NP1, NP2, and NP3

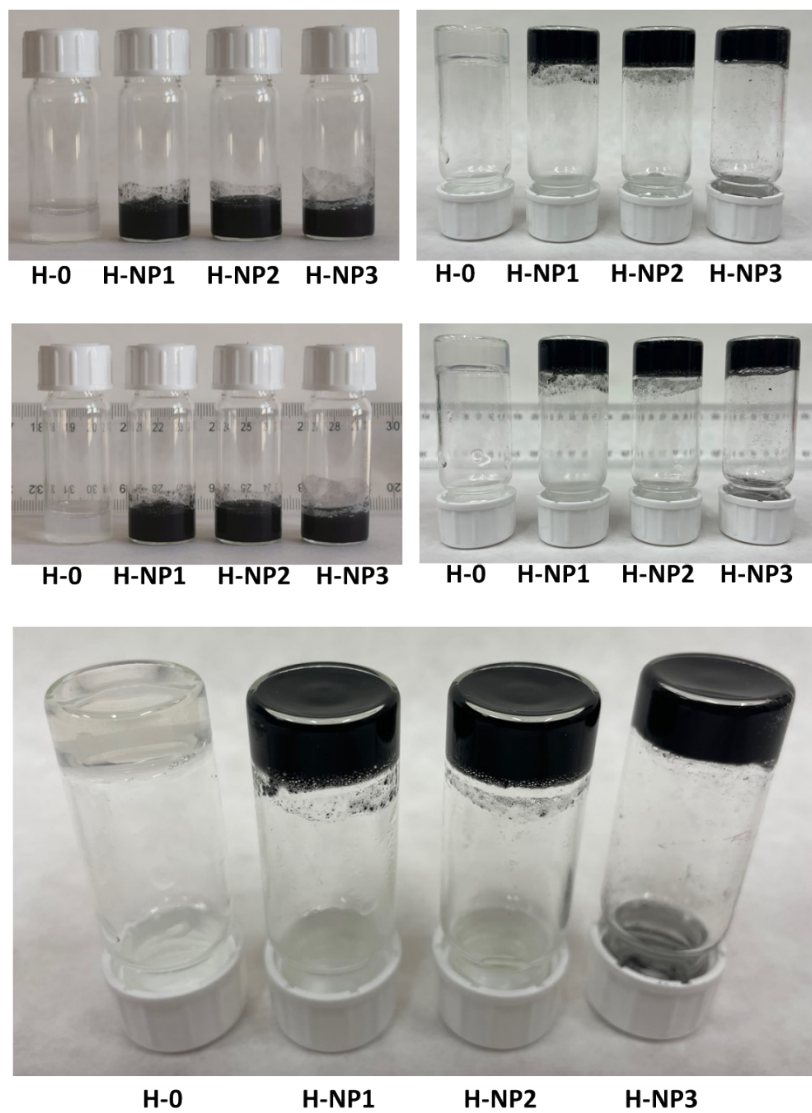

**Fig. S5.** Macroscopical inverted test tube of hydrogels H-0, H-NP1, H-NP2, and H-NP3 respectively

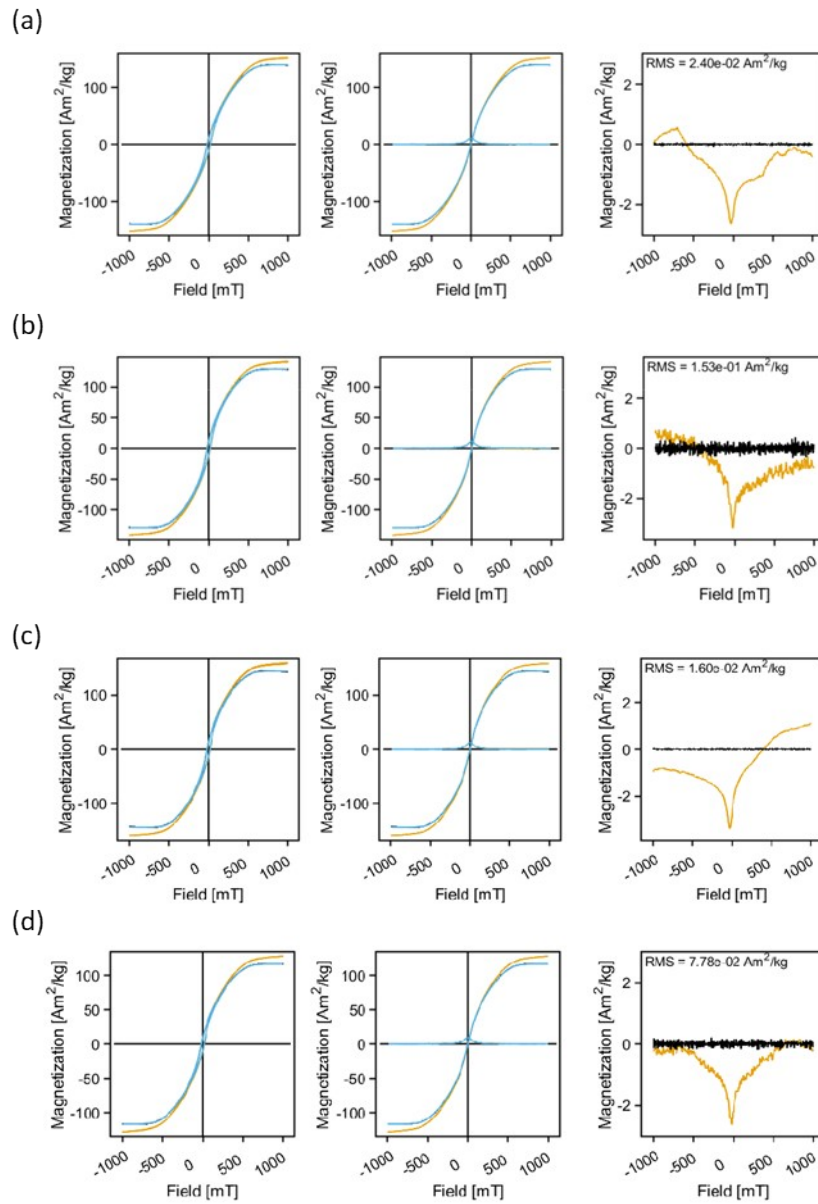

**Fig. S6.** Hysteresis loops (left column), Mh & Mrh curves (middle column), and noise curves (right column) of the studied systems: NP0 (a), NP1 (b), NP2 (c) and NP3 (d) [1]

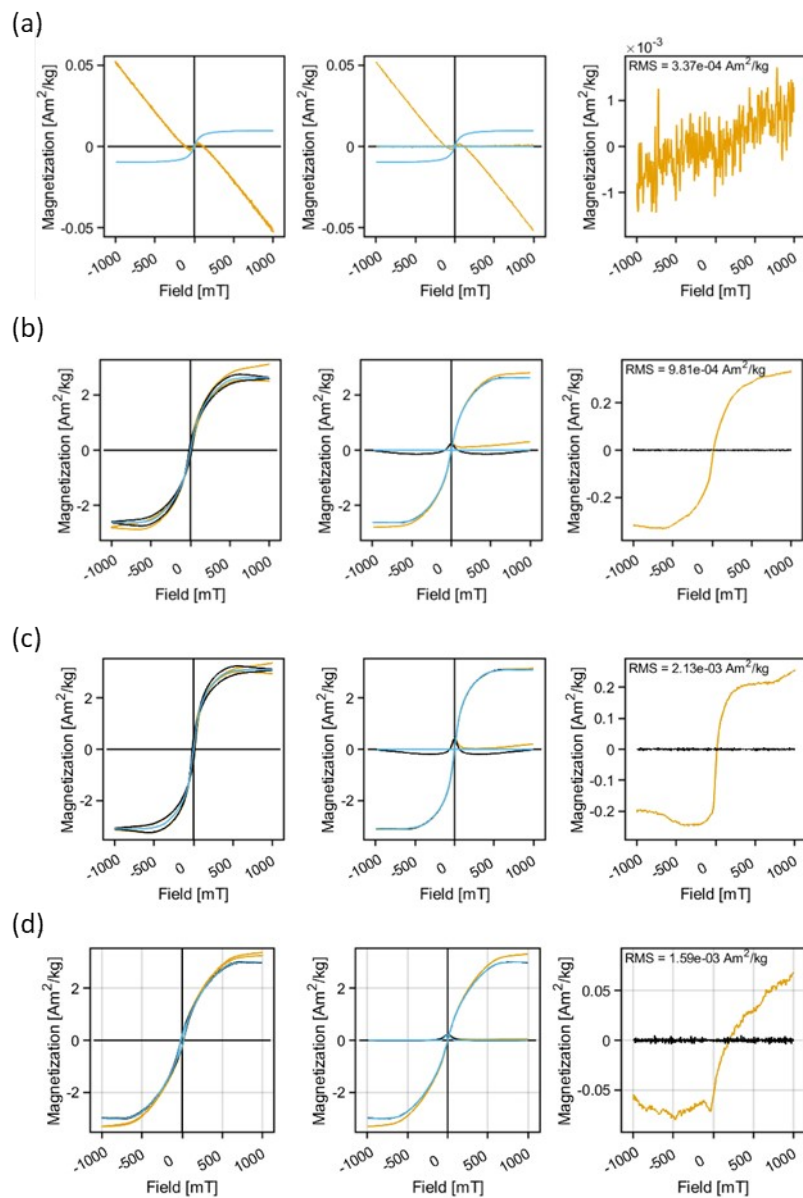

**Fig. S7.** Hysteresis loops (left column), Mh & Mrh curves (middle column), and noise curves (right column) of the studied systems: NP0 (a), NP1 (b), NP2 (c) and NP3 (d) [1]

- [1] G.A. Paterson, X. Zhao, M. Jackson, D. Heslop, Measuring, Processing, and Analyzing Hysteresis Data, *Geochemistry, Geophys. Geosystems*. 19 (2018) 1925–1945. <https://doi.org/10.1029/2018GC007620>.
